# Supplementary material
Source: publisher figshare collection journal article supplement (https://acs.figshare.com/ndownloader/files/3626517)
Supplement: Supplementary file 1 [file 3626517]

# Interaction between Optically-generated Charge-transfer states and Magnetized Charge-transfer States towards Magneto-electric Coupling

*Mingxing Li<sup>1</sup>, Lei He<sup>1</sup>, Hengxing Xu<sup>1</sup>, Ming Shao<sup>1,†</sup>, Jeremy Tisdale<sup>1</sup> and Bin Hu<sup>1\*</sup>*

## **Affiliations:**

1, Department of Materials Science and Engineering, University of Tennessee-Knoxville, Tennessee 37996, USA

\* Correspondence and requests for materials should be addressed to B.H. ([bhu@utk.edu](mailto:bhu@utk.edu)).

† Present Addresses: Soft Matter Materials Branch (RXAS), Air Force Research Lab, Wright-Patterson Air Force Base, Ohio 45433, USA

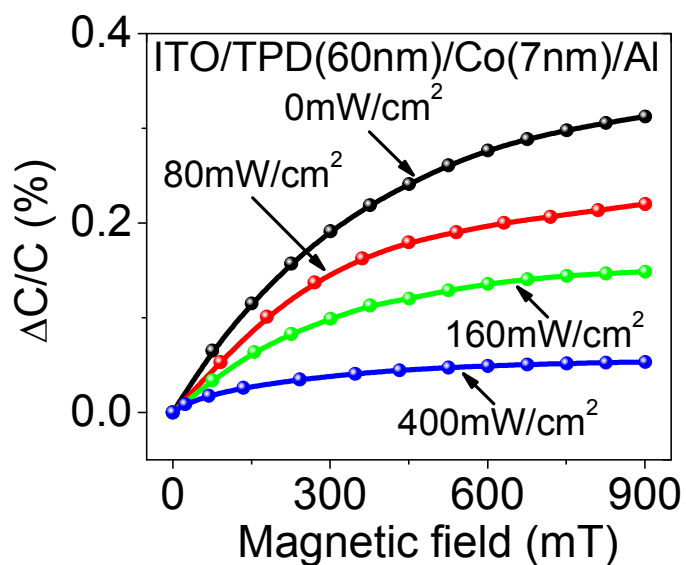

**Figure S1**, Magneto-dielectric from device of ITO/TPD(60nm)/Co(7nm)/Al under different photoexcitation intensities.

In Figure S1, the value of magneto-dielectric from device ITO/TPD(60nm)/Co(7nm)/Al decreases with increasing photoexcitation intensities. It is known that the magneto-dielectric originates from the magnetized CT states formed at the interface between TPD layer and Co layer. Consequently, the decreasing magneto-dielectric signal indicates that the density of magnetized CT states declines as the increasing photoexcitation intensities.

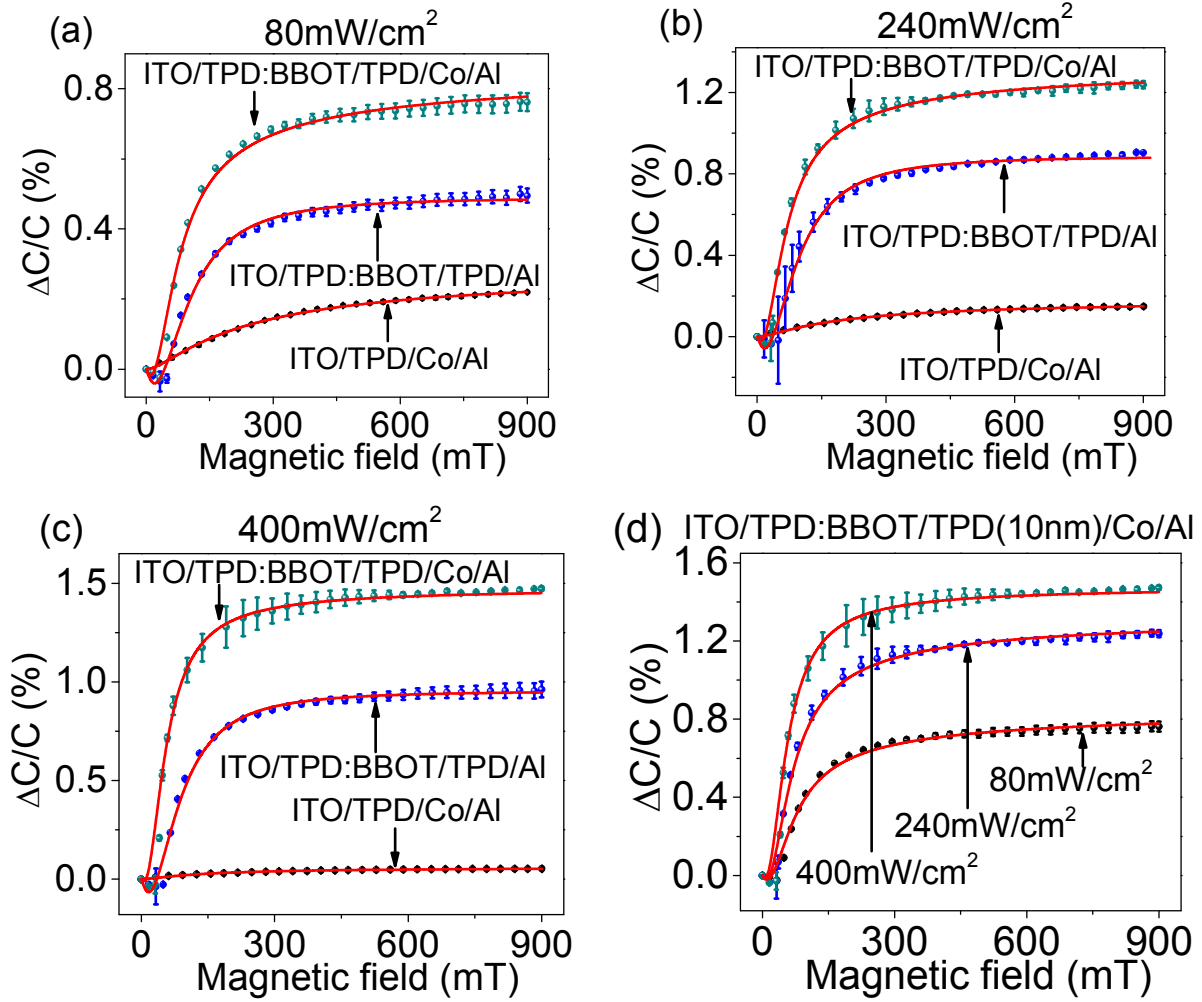

**Figure S2**, Magneto-dielectric from devices of ITO/TPD/Co/Al, ITO/TPD:BBOT/TPD/Al and ITO/TPD:BBOT/TPD/Co/Al under different photoexcitation intensities: (a) 80mW/cm<sup>2</sup> (b) 240mW/cm<sup>2</sup> and (c) 400mW/cm<sup>2</sup>. (d) Magneto-dielectrics from the device ITO/TPD:BBOT/TPD(10nm)/Co/Al under different photoexcitation densities. Red solid lines are the fitting curves.

Magneto-dielectric from magnetized CT states is fitted with Equation (1):

$$MFC_{M-CTs} = \alpha \frac{B^2}{(B + B_0)^2} \quad (1)$$

Magneto-dielectric from optical CT states is fitted with Equation (2):

$$MFC_{P-CTs} = \left( \beta \frac{B^2}{(B + B_1)^2} + b \frac{B^2}{B^2 + B_2^2} \right) \quad (2)$$

Magneto-dielectric from device including interaction between magnetized CT states and optical CT states is fitted with Equation (3)

$$MFC_{Total} = MFC_{P-CTs} + MFC_{M-CTs} + MFC_{Interaction}$$

$$= \left( \beta \frac{B^2}{(B + B_1)^2} + b \frac{B^2}{B^2 + B_2^2} \right) + \alpha \frac{B^2}{(B + B_0)^2} + c * b \frac{B^2}{B^2 + B_2^2} * \alpha \frac{B^2}{(B + B_0)^2} \quad (3)$$

In Figure S2, the red lines are fitting curves by Equations (1), (2) and (3) with parameters in Table SI.

**Table SI**, Parameters used for fitting magneto-dielectric in Figure S2.

|                       | $\alpha$ | $\beta$  | b       | c         | $B_0$     | $B_1$   | $B_2$    |
|-----------------------|----------|----------|---------|-----------|-----------|---------|----------|
| 80mW/cm <sup>2</sup>  | 0.00284  | -0.00139 | 0.00677 | 13.14961  | 120.79591 | 9.02418 | 68.23839 |
| 240mW/cm <sup>2</sup> | 0.00184  | -0.00232 | 0.01145 | 109.82208 | 99.25493  | 9.02418 | 59.13854 |
| 400mW/cm <sup>2</sup> | 0.00061  | -0.00281 | 0.01545 | 164.43385 | 73.24778  | 9.02418 | 50.66152 |
